# Supplementary material for: Lack of Temporal Impairment in Patients With Mild Cognitive Impairment
Source: Front Integr Neurosci. 2019 Sep 12;13:42. doi: 10.3389/fnint.2019.00042 (PMC6751304; doi:10.3389/fnint.2019.00042)
Supplement: TABLE S1 — Time performance. [file Data_Sheet_1.xls]

## Sheet: dati12e14
numero	Group	PSE Anger	PSE Shame	PSE Neutral	SD Anger	SD Shame	SD Neutral	DL Anger	DL Shame	DL Neutre	WF Anger	WF Shame	WF Neutral
19	Controls	701.78	742.77	726.23	108.635	134.035	153.465	73.2732	90.4053	103.511	0.104411	0.121714	0.142531
24	Controls	934.08	1016.15	908.63	224.125	259.33	268.825	151.17	174.915	181.32	0.161838	0.172136	0.199553
26	Controls	866.72	867.18	843.35	160.09	96.33	129.18	107.979	64.9736	87.1306	0.124584	0.0749252	0.103315
33	Controls	640.92	670.82	653.81	68.805	116.73	57.295	46.4083	78.7332	38.6449	0.0724089	0.117369	0.0591072
36	Controls	923.33	930.04	917.96	225.055	241.965	192.45	151.797	163.203	129.806	0.164402	0.17548	0.141407
39	Controls	825.65	906.56	874.41	95.395	103.715	110.57	64.343	69.9547	74.5784	0.0779301	0.077165	0.0852899
503	Controls	842.69	855.35	844.04	172.955	179.9	179.08	116.656	121.341	120.788	0.138433	0.141861	0.143107
504	Controls	756.03	807.41	775.8	391.15	383.505	396.545	263.827	258.67	267.466	0.348963	0.32037	0.344761
516	Controls	849.03	854.63	849.41	144.72	153.135	156.38	97.6122	103.288	105.477	0.114969	0.120857	0.124176
520	Controls	762.52	769.55	752.18	195.475	204.11	120.78	131.846	137.67	81.4649	0.172908	0.178897	0.108305
523	Controls	797.29	815.18	841.23	114.83	191.215	170.65	77.4517	128.973	115.102	0.0971437	0.158214	0.136826
524	Controls	794.51	837.61	828.15	204.535	221.09	223.41	137.957	149.123	150.688	0.173638	0.178034	0.181957
526	Controls	853.49	868.94	853.47	176.765	189.1	186.12	119.226	127.546	125.536	0.139693	0.146784	0.147089
527	Controls	738	798.96	707.23	193.225	263.32	158.385	130.328	177.607	106.829	0.176597	0.222297	0.151053
505	MCI	849.17	831.14	759.15	203.45	246.12	201.795	137.225	166.005	136.109	0.161599	0.199732	0.179291
506	MCI	996.82	1025.08	932.83	336.275	484.59	288.89	226.814	326.851	194.853	0.227538	0.318854	0.208884
507	MCI	895.36	847.71	819.66	347.745	324.42	417.63	234.551	218.818	281.687	0.261962	0.258128	0.343664
508	MCI	680.68	716.32	714.89	181.49	199.475	210.695	122.413	134.544	142.112	0.17984	0.187827	0.198788
509	MCI	719.78	708.94	698.78	141.275	166.08	146.74	95.2886	112.019	98.9747	0.132386	0.15801	0.141639
510	MCI	883.72	943.75	888.15	190.325	148.265	147.635	128.372	100.003	99.5783	0.145264	0.105964	0.112119
511	MCI	808.86	806.5	822.87	82.25	154.37	154.045	55.4768	104.121	103.902	0.0685864	0.129102	0.126268
512	MCI	961.11	966.74	965.05	267.765	285.16	337.08	180.605	192.338	227.357	0.187913	0.198955	0.235591
514	MCI	877.39	790.74	895.69	605.71	1295.28	523.38	408.545	873.65	353.015	0.465637	1.10485	0.394126
517	MCI	888.42	876.94	890.15	109.875	85.77	88.785	74.1096	57.851	59.8846	0.0834173	0.0659692	0.0672747
518	MCI	849.43	859.52	867.43	260.275	286.665	372.52	175.553	193.353	251.261	0.206671	0.224954	0.289661
519	MCI	892.68	853.36	843.01	177.415	181	123.91	119.665	122.083	83.5761	0.134051	0.143061	0.0991401
